# Supplementary material for: Impaired Mitochondrial Function in iPSC-Retinal Pigment Epithelium with the Complement Factor H Polymorphism for Age-Related Macular Degeneration
Source: PubMed Central journal article supplement (PMC8066149; doi:10.3390/cells10040789), 2021-04-02
Supplement: cells-10-00789-s001.pdf [file cells-10-00789-s001.pdf]

**A**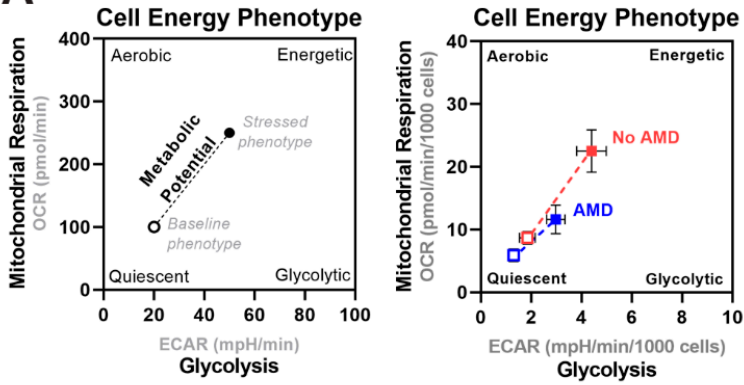**B**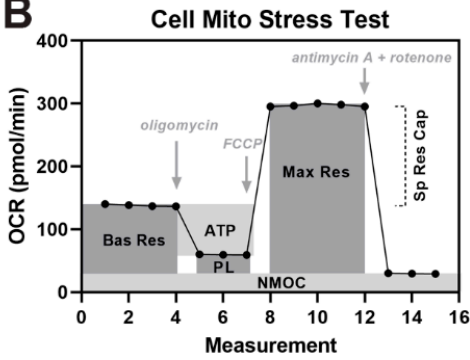**C**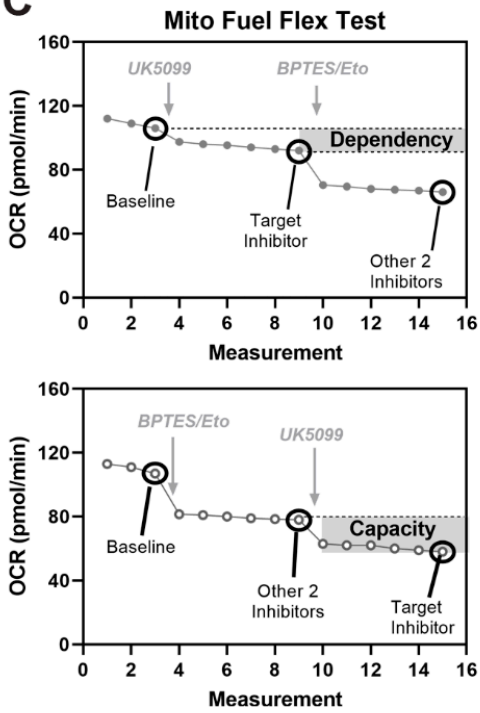

**Figure S1. Determining Cellular Metabolic Function using XFe96 Extracellular Flux Analyzer.** Graphs show trace and methods for calculating metabolic parameters. Arrows indicate time of injection for specific reagents. (A) Data associated with XF Cell Energy Phenotype Test. (B) Trace associated with Cell Mito Stress Test. Analysis of oxygen consumption rate (OCR) following injections of oligomycin, FCCP, and antimycin A + rotenone to perturb mitochondrial function. Calculation of the basal respiration (Bas Res), maximal respiration (Max Res), spare respiratory capacity (Sp Res Cap), ATP-linked respiration (ATP), Proton Leak (PL), and Non-Mito Oxygen Consumption (NMOC) are shown. (C) Example traces associated with Mito Fuel Flex Test. Analysis of OCR following injections of inhibitors targeted to mitochondrial fuel pathways.

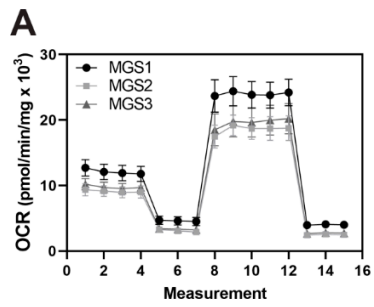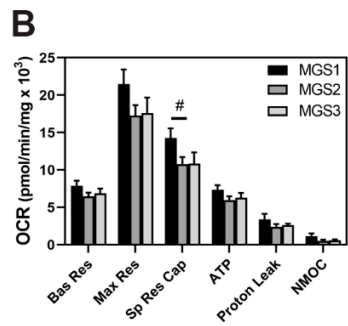

**Figure S2. Comparing mitochondrial function in iPSC-RPE.** (A) Trace from the CMST from multiple donors. (B) Parameters of mitochondrial function calculated from data in A. # $p < 0.01$  determined by One Way ANOVA with Tukey's multiple comparison. MGS1 (No AMD) 8 donors, 11 lines; MGS2 (early AMD) 6 donors, 9 lines; MGS3 (intermediate AMD) 8 donors, 12 lines). Bar graphs are mean  $\pm$  SEM.

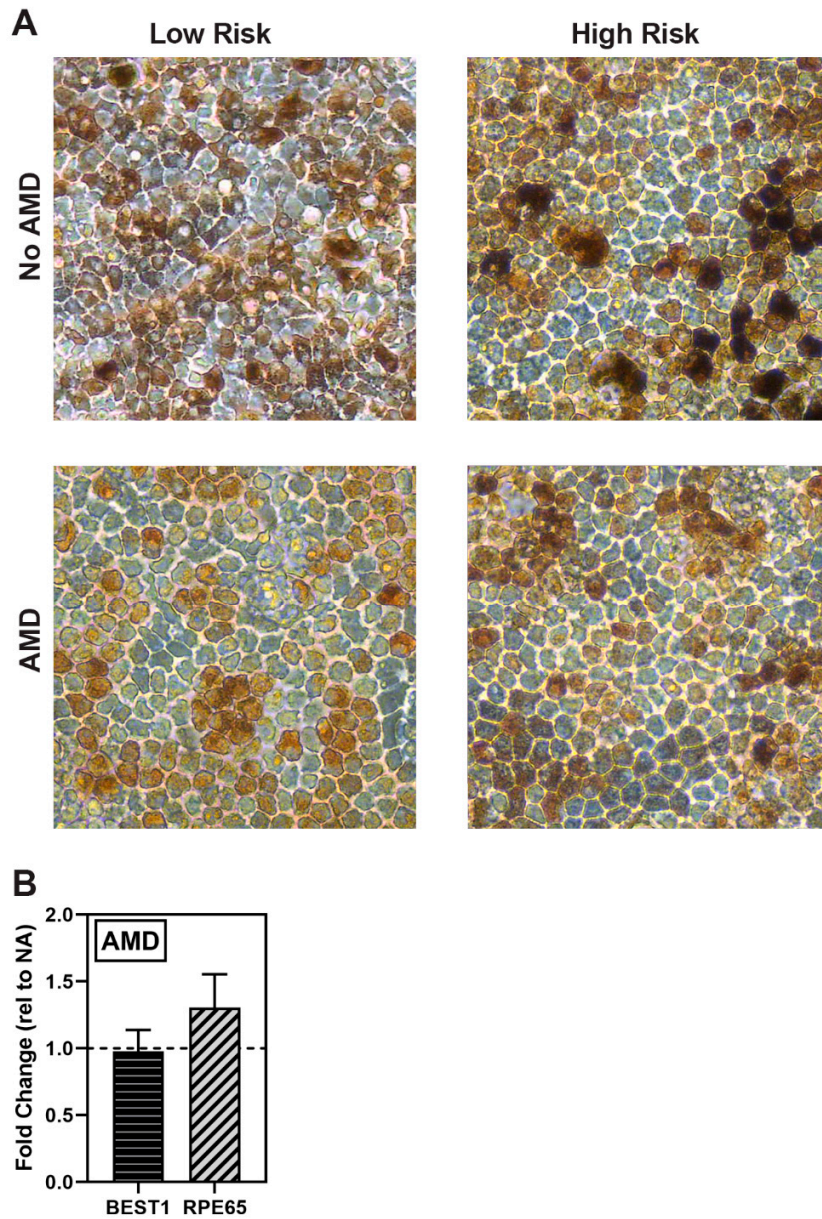

**Figure S3. Characterization of iPSC-RPE.** (A) Phase contrast microscopy images shows confluent iPSC-RPE derived from No AMD and AMD donors form a monolayer with cobblestone appearance and pigmentation. (B) RT-qPCR analysis of prototypic RPE genes was performed on iPSC-RPE derived from No AMD (4 donors, 7 lines) and AMD (12 donors, 17 lines) donors. Data shown are relative to No AMD (dashed line). Bar graphs are mean  $\pm$  SEM.

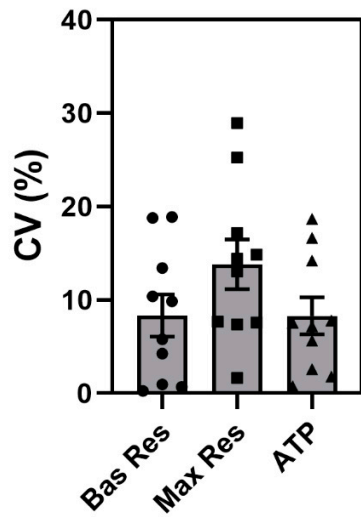

**Figure S4. Determining the degree of concordance between iPSC-RPE lines generated from the same donor.** To compare two iPSC-RPE lines from the same donor (n=10 total donors; 3 No AMD, 7 AMD), coefficient of variance ( $CV = (\text{stdev}/\text{mean}) \times 100$ ) was calculated from the results of mitochondrial parameters measured in the CMST assay. Bar graphs are mean  $\pm$  SEM.

**Table S1. List of primer sequences for Real Time PCR analysis**

| <b>Gene</b>    | <b>Forward Primer</b>      | <b>Reverse Primer</b>      |
|----------------|----------------------------|----------------------------|
| <i>BEST1</i>   | TAGAACCATCAGCGCCGTC        | TGAGTGTAGTGTGTATGTTGG      |
| <i>RPE65</i>   | CGTATGGACTTGGCTTGAATC      | CTGGGTGAGAAACAAAGATGG      |
| <i>GAPDH</i>   | GAGTCAACGGATTTGGTCGT       | GACAAGCTTCCCCTTCTCAG       |
| <i>C3</i>      | GCTACATCATCGGGAAGGAC       | CTGGCATTGTTTCTGGTTCTC      |
| <i>C3AR</i>    | CCTGCTGATGTGGTCTCACCT      | CCTTGTGGTAGCTCAGACTCGT     |
| <i>C5AR1</i>   | GCCCAGGAGACCAGAACAT        | TATCCACAGGGGTGTTGAGG       |
| <i>CFB</i>     | CCCTATGCTGACCCCAATAC       | GATTACACCAACTTGAATGAAACG   |
| <i>CFHv1</i>   | AACAGATTGTCTCAGTTTACCTAGC  | ACCCGCCTTATACACATCCTTC     |
| <i>CFHv2</i>   | CTTTACCCTCTGAACTTCTGATCG   | TCTGGCTGGAATAATACACACATAAC |
| <i>CFI</i>     | TTGGATTCTGACTGCTGCAC       | TTGTCCATATTTGGTAACGATGA    |
| <i>CD46</i>    | TGGCTACCTGTCTCAGATGACG     | GCATCTGATAACCAAACCTCGTAAG  |
| <i>CD55</i>    | CTGCTGGTGCTGTTGTGC         | TCCTCGGAAAACCTGTACG        |
| <i>CD59</i>    | GAGCCCAGGGAGGGAAAGGTT      | CGAGGTTAAGGCAAAACCTACGG    |
| <i>TNFA</i>    | CTCTTCTGCCTGCTGCACTTTG     | ATGGGCTACAGGCTTGCTACTC     |
| <i>MCP1</i>    | CTCATAGCAGCCACCTTCATTC     | TCACAGCTTCTTTGGGACACTT     |
| <i>IL1B</i>    | CCACAGACCTTCCAGGAGAA       | GTGATCGTACAGGTGCATCG       |
| <i>IL6</i>     | GGTACATCCTCGACGGCATCT      | GTGCCTCTTTGCTGCTTTTAC      |
| <i>MT-ND2</i>  | AACCCTCGTTCACAGAAGCT       | GGATTATGGATGCGGTTGCT       |
| <i>MT-ND4</i>  | CCCACTCCCTCTTAGCCAATATT    | TAGGCCACCGCTGCTT           |
| <i>MT-ND6</i>  | GCCCCCGCACCAATAGGATCCTCCC  | CCTGAGGCATGGGGTTCAGGGGT    |
| <i>MT-CYB</i>  | CCCACCCTCACACGATTCTTA      | TTGCTAGGGCTGCAATAATGAA     |
| <i>MT-CO2</i>  | ACCAGGCGACCTGCGACTCCT      | ACCCCGGTCGTGTAGCGGT        |
| <i>MT-ATP6</i> | TTATGAGCGGGCACAGTGATT      | GAAGTGGGCTAGGGCATTITTT     |
| <i>HPRT1</i>   | TGCAGACTTTGCTTTCCTTGGTCAGG | CCAACACTTCGTGGGGTCTTTTCA   |
| <i>ARBP</i>    | CGACCTGGAAGTCCAACACTAC     | ATCTGCTGCATCTGCTTG         |
